# Supplementary material
Source: publisher figshare collection journal article supplement (https://brill.figshare.com/articles/dataset/_/24093588)
Supplement: Supplementary file 1 [file 1]

## Sheet: Sheet1
TABLE S1 Primer sequences for qRT-PCR
Unigene id	Primers (5’→3’)
Contig_162591 (Histone 3)	F: CAAACTGGTGGTGTCAAGAAGC
	R: CAACGGAAGACTAGAGGGGACTA
First_Contig8423 (Actin)	F: GCACGATACGGTGACCAAGATA
	R: CTTACTGGCGTCACGAAAACCT
First_Contig3708	F: GACCCTGCAGTTTTCCAGGT
	R: CACCCAACGGCAATTTCCAA
Contig_34806	F: AAGGGATTTGTTAGCGGCCT
	R: CCACATGTTGCGTATGGAGC
Contig_22333	F: TGACAAGCTAGCTGTGGACC
	R: TCGCCATTCGGACTTTCGTT
Contig_42236	F: TGGGTCACCAATGAGCAGAC
	R: GCTGTAAGTGGCGTTTCGTC
Second_Contig1189	F: AGACGACGTACCTACCTATAAGT
	R: ACAAGCGTTTGTTCCTATGTGT
Contig_33201	F: TATCTGCCGTTCACCGATGCT
	R: GAGGGTTACCCACATGCCATC
Contig_1279	F: TGCTGTTGAGTTGTGCTCTG
	R: CATAACGCGAAGGAAGAGCG
Contig_36068	F: ACTGCATATCGCTGGAGTGG
	R: CGTTGTTCTCCGTGTGCTTG
Contig_3573	F: TGCCTGCAGAGTCAGGTTAC
	R: CCTACGGATGAGCAGAGGAC
First_Contig44	F: AATCAAGGCGTACAACAAGACCC
	R: AATCATAGGCGCCATGTTTATCC
Contig_11105	F: TTGTTTACTATGAAGCCGGTTCC
	R: GGAGATACGGCTTAATATATGCAAC
Contig_38191	F: AAACAACCGCCTACATTTATCCC
	R: GTTCTATTATTTCGCTCGCCTCT
Contig_49941	F: CTATTCCCAGTTGGATGCGTCTC
	R: ACAGCGCGTAGAACTTATCAAAC
