# Supplementary material
Source: publisher figshare collection journal article supplement (https://brill.figshare.com/articles/dataset/_/24093588)
Supplement: Supplementary file 1 [file 1]

# **Tissue distribution of minerals and antinutrients of *Clanis bilineata tsingtauca* Mell larvae based on different methods of consumption**

C.-X. Zhu<sup>1</sup>, L.-Q. Jing<sup>2</sup>, M. Zhao<sup>1</sup>, M.-X. Lu<sup>1,\*</sup> and Y.-Z. Du<sup>1,3,\*</sup>

<sup>1</sup>College of Plant Protection and Institute of Applied Entomology, Yangzhou University, Yangzhou 225009, China; <sup>2</sup>Jiangsu Key Laboratory of Crop Genetics and Physiology/Co-Innovation Center for Modern Production Technology of Grain Crops, Yangzhou University, Yangzhou 225009, China; <sup>3</sup>Joint International Research Laboratory of Agriculture and Agri-Product Safety, Yangzhou University, Yangzhou 225009, China; \*lumx@yzu.edu.cn; yzdu@yzu.edu.cn

**Supplementary material**
